# Supplementary material for: Urinary Exosomes Identify Inflammatory Pathways in Vancomycin Associated Acute Kidney Injury
Source: Int J Mol Sci. 2021 Mar 10;22(6):2784. doi: 10.3390/ijms22062784 (PMC7999309; doi:10.3390/ijms22062784)
Supplement: Supplementary file 1 [file ijms-22-02784-s001.xlsx]

## Sheet: Sheet1
AKI CASES
Annotation Cluster 1	Enrichment Score: 5.344517398579918
Category	Term	Count	%	PValue	Genes	List Total	Pop Hits	Pop Total	Fold Enrichment	Bonferroni	Benjamini	FDR
GOTERM_CC_DIRECT	GO:0072562~blood microparticle	19	46.34	2.66e-14	P02671, P02679, P27105, P01860, P02787, P01861, P01871, P02675, P26038, A0A0B4J231, P01011, P01859, A0A0A0MS08, P00738, A0A0G2JPR0, Q08380, P01024, P01023, P0C0L5	41	95	1931	9.42	3.89e-12	3.89e-12	3.17e-11
GOTERM_CC_DIRECT	GO:0005615~extracellular space	21	51.22	3.45e-08	P02671, P02679, P27105, P01860, P02787, P01861, P01871, Q9Y281, P02675, P26038, P01011, A0A024R6I7, P01859, A0A0A0MS08, P01009, P00738, A0A0G2JPR0, Q08380, E9PK25, P01024, P0C0L5, P00918	41	267	1931	3.7	5.03e-06	2.52e-06	4.1e-05
UP_KEYWORDS	Secreted	19	46.34	1.44e-07	Q5JWF2, P02671, P02679, P01860, P02787, P01861, P01871, P02675, A0A0B4J231, P01011, A0A024R6I7, P01859, A0A0A0MS08, P01009, P00738, A0A0G2JPR0, Q08380, P01024, P01023, P0C0L5	41	239	1991	3.86	1.91e-05	1.91e-05	0.000168
GOTERM_CC_DIRECT	GO:0005576~extracellular region	17	41.46	1.78e-06	Q5JWF2, P02671, P02679, P01860, P02787, P01861, P02675, P01011, A0A024R6I7, P01859, A0A0A0MS08, P01009, P00738, A0A0G2JPR0, Q08380, P01024, P01023, P0C0L5	41	215	1931	3.72	0.000259	5.19e-05	0.00211202
GOTERM_BP_DIRECT	GO:0045087~innate immune response	10	24.39	5.37e-06	P01860, P02671, P01861, P01871, P02675, P01859, A0A0A0MS08, A0A0G2JPR0, A0A0B4J231, P0C0L5	40	68	1887	6.94	0.00181478	0.000605	0.00731157
UP_SEQ_FEATURE	glycosylation site:N-linked (GlcNAc...)	18	43.9	8.68e-05	P02671, P02679, P01860, P02787, P01861, P01871, P02675, P01011, Q8NFJ5, A0A024R6I7, P01859, A0A0A0MS08, P01009, P00738, A0A0G2JPR0, Q08380, P01024, P01023, P0C0L5	40	333	1940	2.62	0.0181472	0.004568	0.109682
UP_KEYWORDS	Glycoprotein	19	46.34	0.000129	Q5JWF2, P02671, P02679, P01860, P02787, P01861, P01871, P02675, A0A024R6I7, P01011, Q8NFJ5, P01859, A0A0A0MS08, P01009, P00738, A0A0G2JPR0, Q08380, P01024, P01023, P0C0L5	41	378	1991	2.44	0.0170621	0.00429309	0.151183
UP_SEQ_FEATURE	disulfide bond	15	36.59	0.000259	P02671, P02679, P01860, P02787, P01861, P01871, P02675, P01859, A0A0A0MS08, P00738, A0A0G2JPR0, Q08380, P01024, P01023, P0C0L5	40	258	1940	2.82	0.0532441	0.0108831	0.327327
UP_SEQ_FEATURE	signal peptide	16	39.02	0.000451	P02671, P02679, P01860, P02787, P01871, P02675, P01011, A0A024R6I7, A0A0A0MS08, P01009, P00738, A0A0G2JPR0, P11021, Q08380, P01024, P01023, P0C0L5	40	306	1940	2.54	0.0906981	0.0157215	0.568118
UP_KEYWORDS	Disulfide bond	16	39.02	0.000599	P02671, P02679, P01860, P02787, P01861, P01871, P02675, A0A0B4J231, P01859, A0A0A0MS08, P00738, A0A0G2JPR0, Q08380, P01024, P01023, P0C0L5	41	313	1991	2.48	0.0766302	0.0158187	0.698461
UP_KEYWORDS	Signal	15	36.59	0.0164174	Q5JWF2, P02671, P02679, P02787, P02675, A0A0B4J231, P01011, A0A024R6I7, P01009, P00738, A0A0G2JPR0, P11021, Q08380, P01024, P01023, P0C0L5	41	393	1991	1.85	0.889377	0.197612	17.5978
Annotation Cluster 2	Enrichment Score: 3.7086832105550305
Category	Term	Count	%	PValue	Genes	List Total	Pop Hits	Pop Total	Fold Enrichment	Bonferroni	Benjamini	FDR
GOTERM_BP_DIRECT	GO:0006911~phagocytosis, engulfment	7	17.07	5.49e-07	P01860, P01861, P01871, P01859, A0A0A0MS08, A0A0B4J231, P35579	40	17	1887	19.43	0.000186	0.000186	0.000747
GOTERM_CC_DIRECT	GO:0009897~external side of plasma membrane	9	21.95	6.3e-07	P01860, P02671, P02679, P01861, P01871, P02675, P01859, A0A0A0MS08, A0A0B4J231	41	39	1931	10.87	9.19e-05	2.3e-05	0.000748
UP_SEQ_FEATURE	region of interest:CH2	5	12.2	4.68e-06	P01860, P01861, P01871, P01859, A0A0A0MS08	40	7	1940	34.64	0.000988	0.000988	0.00592169
UP_SEQ_FEATURE	region of interest:CH3	5	12.2	4.68e-06	P01860, P01861, P01871, P01859, A0A0A0MS08	40	7	1940	34.64	0.000988	0.000988	0.00592169
UP_SEQ_FEATURE	region of interest:CH1	5	12.2	4.68e-06	P01860, P01861, P01871, P01859, A0A0A0MS08	40	7	1940	34.64	0.000988	0.000988	0.00592169
GOTERM_BP_DIRECT	GO:0006910~phagocytosis, recognition	6	14.63	5.07e-06	P01860, P01861, P01871, P01859, A0A0A0MS08, A0A0B4J231	40	14	1887	20.22	0.0017123	0.000857	0.00689835
GOTERM_BP_DIRECT	GO:0050871~positive regulation of B cell activation	6	14.63	5.07e-06	P01860, P01861, P01871, P01859, A0A0A0MS08, A0A0B4J231	40	14	1887	20.22	0.0017123	0.000857	0.00689835
GOTERM_BP_DIRECT	GO:0045087~innate immune response	10	24.39	5.37e-06	P01860, P02671, P01861, P01871, P02675, P01859, A0A0A0MS08, A0A0G2JPR0, A0A0B4J231, P0C0L5	40	68	1887	6.94	0.00181478	0.000605	0.00731157
GOTERM_BP_DIRECT	GO:0006958~complement activation, classical pathway	9	21.95	6.13e-06	P01860, P01861, P01871, P01859, A0A0A0MS08, A0A0G2JPR0, A0A0B4J231, P01024, P0C0L5	40	52	1887	8.16	0.00206912	0.000518	0.00833731
GOTERM_MF_DIRECT	GO:0034987~immunoglobulin receptor binding	6	14.63	8.77e-06	P01860, P01861, P01871, P01859, A0A0A0MS08, A0A0B4J231	41	15	1876	18.3	0.00110413	0.00110413	0.0101531
UP_SEQ_FEATURE	region of interest:Hinge	5	12.2	2.69e-05	P01860, P01861, P01871, P01859, A0A0A0MS08	40	10	1940	24.25	0.00566006	0.00283405	0.0340075
INTERPRO	IPR003597:Immunoglobulin C1-set	6	14.63	3.42e-05	P01860, P01861, P01871, P01859, A0A0A0MS08, A0A0B4J231	41	20	1957	14.32	0.0051513	0.0051513	0.0408823
INTERPRO	IPR003006:Immunoglobulin/major histocompatibility complex, conserved site	6	14.63	3.42e-05	P01860, P01861, P01871, P01859, A0A0A0MS08, A0A0B4J231	41	20	1957	14.32	0.0051513	0.0051513	0.0408823
GOTERM_BP_DIRECT	GO:0050853~B cell receptor signaling pathway	6	14.63	3.58e-05	P01860, P01861, P01871, P01859, A0A0A0MS08, A0A0B4J231	40	20	1887	14.15	0.0120442	0.00172955	0.0487651
UP_KEYWORDS	Immunoglobulin C region	5	12.2	4.17e-05	P01860, P01861, P01871, P01859, A0A0A0MS08	41	11	1991	22.07	0.00553281	0.00277024	0.0487652
GOTERM_BP_DIRECT	GO:0042742~defense response to bacterium	6	14.63	4.63e-05	P01860, P01861, P01859, A0A0A0MS08, P00738, A0A0B4J231	40	21	1887	13.48	0.0155426	0.00195616	0.0630364
GOTERM_CC_DIRECT	GO:0042571~immunoglobulin complex, circulating	5	12.2	4.7e-05	P01860, P01861, P01859, A0A0A0MS08, A0A0B4J231	41	11	1931	21.41	0.00683863	0.00114303	0.0558487
GOTERM_BP_DIRECT	GO:0006956~complement activation	7	17.07	0.000182	P01860, P01861, P01859, A0A0A0MS08, A0A0G2JPR0, P01024, P0C0L5	40	43	1887	7.68	0.0597579	0.00682305	0.247729
SMART	SM00407:IGc1	6	14.63	0.000237	P01860, P01861, P01871, P01859, A0A0A0MS08, A0A0B4J231	34	20	1061	9.36	0.00873285	0.00873285	0.212633
GOTERM_MF_DIRECT	GO:0004252~serine-type endopeptidase activity	8	19.51	0.000519	P01860, P01861, P01859, A0A0A0MS08, P00738, A0A0G2JPR0, P01024, P0C0L5	41	70	1876	5.23	0.0633199	0.0321777	0.599411
GOTERM_MF_DIRECT	GO:0003823~antigen binding	6	14.63	0.00115313	P01860, P01861, P01871, P01859, A0A0A0MS08, A0A0B4J231	41	39	1876	7.04	0.135305	0.0473041	1.32729
UP_KEYWORDS	Immunoglobulin domain	6	14.63	0.00301805	P01860, P01861, P01871, P01859, A0A0A0MS08, A0A0B4J231	41	51	1991	5.71	0.331025	0.064806	3.47255
UP_SEQ_FEATURE	chain:Ig gamma-3 chain C region	3	7.32	0.0037914	P01860, P01871, A0A0A0MS08	40	5	1940	29.1	0.551347	0.0953329	4.68937
UP_SEQ_FEATURE	chain:Ig gamma-1 chain C region	3	7.32	0.0037914	P01860, P01871, A0A0A0MS08	40	5	1940	29.1	0.551347	0.0953329	4.68937
UP_SEQ_FEATURE	chain:Ig mu chain C region	3	7.32	0.0037914	P01860, P01871, A0A0A0MS08	40	5	1940	29.1	0.551347	0.0953329	4.68937
UP_SEQ_FEATURE	chain:anti-RhD monoclonal T125 gamma1 heavy chain	3	7.32	0.0037914	P01860, P01871, A0A0A0MS08	40	5	1940	29.1	0.551347	0.0953329	4.68937
UP_SEQ_FEATURE	region of interest:CH4	3	7.32	0.0037914	P01860, P01871, A0A0A0MS08	40	5	1940	29.1	0.551347	0.0953329	4.68937
GOTERM_BP_DIRECT	GO:0006508~proteolysis	8	19.51	0.00783621	P01860, P01861, Q96KP4, P01859, A0A0A0MS08, A0A0G2JPR0, P01024, P0C0L5	40	115	1887	3.28	0.929987	0.144797	10.1509
INTERPRO	IPR007110:Immunoglobulin-like domain	6	14.63	0.0215333	P01860, P01861, P01871, P01859, A0A0A0MS08, A0A0B4J231	41	80	1957	3.58	0.962636	0.305961	22.9142
BBID	79.B_cell_Activation	3	7.32	0.0462922	P01860, P01871, A0A0A0MS08	6	5	63	6.3	0.31558	0.31558	22.855
INTERPRO	IPR013783:Immunoglobulin-like fold	6	14.63	0.048231	P01860, P01861, P01871, P01859, A0A0A0MS08, A0A0B4J231	41	99	1957	2.89	0.999427	0.525947	44.6221
BBID	78.B_Cell_Development	3	7.32	0.0671065	P01860, P01871, A0A0A0MS08	6	6	63	5.25	0.426337	0.242595	31.6334
GOTERM_BP_DIRECT	GO:0038096~Fc-gamma receptor signaling pathway involved in phagocytosis	4	9.76	0.0982384	P01860, P01861, P01859, A0A0A0MS08	40	54	1887	3.49	1	0.700369	75.5102
Annotation Cluster 3	Enrichment Score: 3.5435937015450287
Category	Term	Count	%	PValue	Genes	List Total	Pop Hits	Pop Total	Fold Enrichment	Bonferroni	Benjamini	FDR
GOTERM_CC_DIRECT	GO:0005576~extracellular region	17	41.46	1.78e-06	Q5JWF2, P02671, P02679, P01860, P02787, P01861, P02675, P01011, A0A024R6I7, P01859, A0A0A0MS08, P01009, P00738, A0A0G2JPR0, Q08380, P01024, P01023, P0C0L5	41	215	1931	3.72	0.000259	5.19e-05	0.00211202
GOTERM_BP_DIRECT	GO:0002576~platelet degranulation	8	19.51	1.72e-05	P02671, P02679, P02787, P02675, P01009, Q08380, P01023, P01011, A0A024R6I7	40	43	1887	8.78	0.00580975	0.00116466	0.023452
KEGG_PATHWAY	hsa04610:Complement and coagulation cascades	8	19.51	3.48e-05	P02671, P02679, P02675, P01009, A0A0G2JPR0, P01024, P01023, P0C0L5, A0A024R6I7	27	43	1086	7.48	0.00315841	0.00315841	0.0378908
GOTERM_CC_DIRECT	GO:0031093~platelet alpha granule lumen	6	14.63	9.4e-05	P02671, P02679, P02675, P01009, P01023, P01011, A0A024R6I7	41	24	1931	11.77	0.0136355	0.0019594	0.111707
UP_SEQ_FEATURE	signal peptide	16	39.02	0.000451	P02671, P02679, P01860, P02787, P01871, P02675, P01011, A0A024R6I7, A0A0A0MS08, P01009, P00738, A0A0G2JPR0, P11021, Q08380, P01024, P01023, P0C0L5	40	306	1940	2.54	0.0906981	0.0157215	0.568118
UP_KEYWORDS	Hemostasis	4	9.76	0.00777761	P02671, P02679, P02675, P01009, A0A024R6I7	41	21	1991	9.25	0.646002	0.137873	8.72537
UP_KEYWORDS	Blood coagulation	4	9.76	0.00777761	P02671, P02679, P02675, P01009, A0A024R6I7	41	21	1991	9.25	0.646002	0.137873	8.72537
UP_KEYWORDS	Signal	15	36.59	0.0164174	Q5JWF2, P02671, P02679, P02787, P02675, A0A0B4J231, P01011, A0A024R6I7, P01009, P00738, A0A0G2JPR0, P11021, Q08380, P01024, P01023, P0C0L5	41	393	1991	1.85	0.889377	0.197612	17.5978
Annotation Cluster 4	Enrichment Score: 2.6558128335455087
Category	Term	Count	%	PValue	Genes	List Total	Pop Hits	Pop Total	Fold Enrichment	Bonferroni	Benjamini	FDR
KEGG_PATHWAY	hsa04610:Complement and coagulation cascades	8	19.51	3.48e-05	P02671, P02679, P02675, P01009, A0A0G2JPR0, P01024, P01023, P0C0L5, A0A024R6I7	27	43	1086	7.48	0.00315841	0.00315841	0.0378908
UP_SEQ_FEATURE	cross-link:Isoglutamyl cysteine thioester (Cys-Gln)	4	9.76	7.31e-05	A0A0G2JPR0, P01024, P01023, P0C0L5	40	5	1940	38.8	0.0153137	0.00513083	0.0924315
UP_KEYWORDS	Thioester bond	4	9.76	7.31e-05	A0A0G2JPR0, P01024, P01023, P0C0L5	41	5	1991	38.85	0.00968054	0.00323732	0.0854851
INTERPRO	IPR019565:Alpha-2-macroglobulin, thiol-ester bond-forming	4	9.76	7.7e-05	A0A0G2JPR0, P01024, P01023, P0C0L5	41	5	1957	38.19	0.0115572	0.0057954	0.0919945
INTERPRO	IPR019742:Alpha-2-macroglobulin, conserved site	4	9.76	7.7e-05	A0A0G2JPR0, P01024, P01023, P0C0L5	41	5	1957	38.19	0.0115572	0.0057954	0.0919945
INTERPRO	IPR002890:Alpha-2-macroglobulin, N-terminal	4	9.76	0.000152	A0A0G2JPR0, P01024, P01023, P0C0L5	41	6	1957	31.82	0.0226594	0.00761092	0.181305
INTERPRO	IPR001599:Alpha-2-macroglobulin	4	9.76	0.000152	A0A0G2JPR0, P01024, P01023, P0C0L5	41	6	1957	31.82	0.0226594	0.00761092	0.181305
INTERPRO	IPR011626:A-macroglobulin complement component	4	9.76	0.000152	A0A0G2JPR0, P01024, P01023, P0C0L5	41	6	1957	31.82	0.0226594	0.00761092	0.181305
INTERPRO	IPR011625:Alpha-2-macroglobulin, N-terminal 2	4	9.76	0.000152	A0A0G2JPR0, P01024, P01023, P0C0L5	41	6	1957	31.82	0.0226594	0.00761092	0.181305
INTERPRO	IPR009048:Alpha-macroglobulin, receptor-binding	4	9.76	0.000152	A0A0G2JPR0, P01024, P01023, P0C0L5	41	6	1957	31.82	0.0226594	0.00761092	0.181305
INTERPRO	IPR008930:Terpenoid cyclases/protein prenyltransferase alpha-alpha toroid	4	9.76	0.000152	A0A0G2JPR0, P01024, P01023, P0C0L5	41	6	1957	31.82	0.0226594	0.00761092	0.181305
SMART	SM01361:SM01361	4	9.76	0.000515	A0A0G2JPR0, P01024, P01023, P0C0L5	34	6	1061	20.8	0.0188943	0.00949218	0.461843
SMART	SM01359:SM01359	4	9.76	0.000515	A0A0G2JPR0, P01024, P01023, P0C0L5	34	6	1061	20.8	0.0188943	0.00949218	0.461843
SMART	SM01360:SM01360	4	9.76	0.000515	A0A0G2JPR0, P01024, P01023, P0C0L5	34	6	1061	20.8	0.0188943	0.00949218	0.461843
GOTERM_BP_DIRECT	GO:0010951~negative regulation of endopeptidase activity	6	14.63	0.000883	P01009, A0A0G2JPR0, P01024, P01023, P01011, P0C0L5, A0A024R6I7	40	38	1887	7.45	0.258218	0.0267892	1.19519
GOTERM_BP_DIRECT	GO:2000427~positive regulation of apoptotic cell clearance	3	7.32	0.00123292	A0A0G2JPR0, P01024, P0C0L5	40	3	1887	47.18	0.340969	0.0341519	1.66452
KEGG_PATHWAY	hsa05133:Pertussis	5	12.2	0.00168163	Q9Y281, A0A0G2JPR0, E9PK25, P01024, P0C0L5	27	23	1086	8.74	0.142005	0.0737198	1.81811
UP_SEQ_FEATURE	domain:Anaphylatoxin-like	3	7.32	0.0023041	A0A0G2JPR0, P01024, P0C0L5	40	4	1940	36.38	0.385364	0.0671699	2.87449
UP_SEQ_FEATURE	domain:NTR	3	7.32	0.0023041	A0A0G2JPR0, P01024, P0C0L5	40	4	1940	36.38	0.385364	0.0671699	2.87449
INTERPRO	IPR018081:Anaphylatoxin	3	7.32	0.00238229	A0A0G2JPR0, P01024, P0C0L5	41	4	1957	35.8	0.302432	0.0694979	2.81124
INTERPRO	IPR018933:Netrin module, non-TIMP type	3	7.32	0.00238229	A0A0G2JPR0, P01024, P0C0L5	41	4	1957	35.8	0.302432	0.0694979	2.81124
INTERPRO	IPR001840:Complement C3a/C4a/C5a anaphylatoxin	3	7.32	0.00238229	A0A0G2JPR0, P01024, P0C0L5	41	4	1957	35.8	0.302432	0.0694979	2.81124
INTERPRO	IPR001134:Netrin domain	3	7.32	0.00238229	A0A0G2JPR0, P01024, P0C0L5	41	4	1957	35.8	0.302432	0.0694979	2.81124
INTERPRO	IPR000020:Anaphylatoxin/fibulin	3	7.32	0.00391916	A0A0G2JPR0, P01024, P0C0L5	41	5	1957	28.64	0.447309	0.0940997	4.58622
INTERPRO	IPR008993:Tissue inhibitor of metalloproteinases-like, OB-fold	3	7.32	0.00391916	A0A0G2JPR0, P01024, P0C0L5	41	5	1957	28.64	0.447309	0.0940997	4.58622
SMART	SM00643:C345C	3	7.32	0.00541615	A0A0G2JPR0, P01024, P0C0L5	34	4	1061	23.4	0.18204	0.0489947	4.75948
GOTERM_MF_DIRECT	GO:0004866~endopeptidase inhibitor activity	4	9.76	0.00587175	A0A0G2JPR0, P01024, P01023, P0C0L5	41	18	1876	10.17	0.523849	0.137917	6.59255
SMART	SM00104:ANATO	3	7.32	0.00885139	A0A0G2JPR0, P01024, P0C0L5	34	5	1061	18.72	0.280328	0.0636743	7.67284
KEGG_PATHWAY	hsa05150:Staphylococcus aureus infection	4	9.76	0.0106062	P02679, A0A0G2JPR0, P01024, P0C0L5	27	20	1086	8.04	0.621037	0.276344	10.9743
UP_KEYWORDS	Innate immunity	5	12.2	0.0106269	P02671, P02675, A0A0G2JPR0, P01024, P0C0L5	41	44	1991	5.52	0.758512	0.146049	11.7435
UP_KEYWORDS	Immunity	6	14.63	0.019162	P02671, P02675, P00738, A0A0G2JPR0, P01024, P0C0L5	41	79	1991	3.69	0.923715	0.208586	20.2467
UP_KEYWORDS	Cleavage on pair of basic residues	4	9.76	0.0249027	Q5JWF2, A0A0G2JPR0, P01024, P0C0L5	41	32	1991	6.07	0.965056	0.243838	25.5371
BIOCARTA	h_lectinPathway:Lectin Induced Complement Pathway	3	7.32	0.0436043	A0A0G2JPR0, P01024, P0C0L5	13	9	306	7.85	0.887477	0.517222	34.784
GOTERM_BP_DIRECT	GO:0030449~regulation of complement activation	3	7.32	0.051712	A0A0G2JPR0, P01024, P0C0L5	40	18	1887	7.86	1	0.526585	51.4429
UP_KEYWORDS	Complement pathway	3	7.32	0.0542657	A0A0G2JPR0, P01024, P0C0L5	41	19	1991	7.67	0.999401	0.411418	47.9197
UP_KEYWORDS	Inflammatory response	3	7.32	0.0595442	A0A0G2JPR0, P01024, P0C0L5	41	20	1991	7.28	0.999716	0.41977	51.2189
GOTERM_BP_DIRECT	GO:0006954~inflammatory response	4	9.76	0.0603361	A0A0G2JPR0, P01024, P01011, P0C0L5	40	44	1887	4.29	1	0.55471	57.1186
BIOCARTA	h_classicPathway:Classical Complement Pathway	3	7.32	0.0748155	A0A0G2JPR0, P01024, P0C0L5	13	12	306	5.88	0.977859	0.614258	52.5541
BIOCARTA	h_compPathway:Complement Pathway	3	7.32	0.0987041	A0A0G2JPR0, P01024, P0C0L5	13	14	306	5.04	0.993855	0.572026	63.0793
KEGG_PATHWAY	hsa05322:Systemic lupus erythematosus	3	7.32	0.134272	A0A0G2JPR0, P01024, P0C0L5	27	27	1086	4.47	0.999998	0.927499	79.2347
Annotation Cluster 5	Enrichment Score: 2.053300825463968
Category	Term	Count	%	PValue	Genes	List Total	Pop Hits	Pop Total	Fold Enrichment	Bonferroni	Benjamini	FDR
GOTERM_CC_DIRECT	GO:0031093~platelet alpha granule lumen	6	14.63	9.4e-05	P02671, P02679, P02675, P01009, P01023, P01011, A0A024R6I7	41	24	1931	11.77	0.0136355	0.0019594	0.111707
GOTERM_BP_DIRECT	GO:0010951~negative regulation of endopeptidase activity	6	14.63	0.000883	P01009, A0A0G2JPR0, P01024, P01023, P01011, P0C0L5, A0A024R6I7	40	38	1887	7.45	0.258218	0.0267892	1.19519
UP_KEYWORDS	Serine protease inhibitor	3	7.32	0.0706045	P01009, P01023, P01011, A0A024R6I7	41	22	1991	6.62	0.999941	0.436082	57.5208
UP_KEYWORDS	Protease inhibitor	3	7.32	0.0883285	P01009, P01023, P01011, A0A024R6I7	41	25	1991	5.83	0.999995	0.495048	66.0845
GOTERM_MF_DIRECT	GO:0004867~serine-type endopeptidase inhibitor activity	3	7.32	0.104511	P01009, P01023, P01011, A0A024R6I7	41	26	1876	5.28	0.999999	0.751137	72.1499
Annotation Cluster 6	Enrichment Score: 1.9108292388138561
Category	Term	Count	%	PValue	Genes	List Total	Pop Hits	Pop Total	Fold Enrichment	Bonferroni	Benjamini	FDR
GOTERM_BP_DIRECT	GO:0034116~positive regulation of heterotypic cell-cell adhesion	4	9.76	3.22e-05	O75955, P02671, P02679, P02675	40	4	1887	47.18	0.0108337	0.00181382	0.0438382
GOTERM_CC_DIRECT	GO:0031093~platelet alpha granule lumen	6	14.63	9.4e-05	P02671, P02679, P02675, P01009, P01023, P01011, A0A024R6I7	41	24	1931	11.77	0.0136355	0.0019594	0.111707
GOTERM_BP_DIRECT	GO:0070527~platelet aggregation	5	12.2	0.000873	Q5JWF2, P02671, P02679, P02675, P35579	40	22	1887	10.72	0.255587	0.0290846	1.1811
INTERPRO	IPR012290:Fibrinogen, alpha/beta/gamma chain, coiled coil domain	3	7.32	0.00120676	P02671, P02679, P02675	41	3	1957	47.73	0.166675	0.0445595	1.43323
GOTERM_BP_DIRECT	GO:0043623~cellular protein complex assembly	3	7.32	0.00123292	P02671, P02679, P02675	40	3	1887	47.18	0.340969	0.0341519	1.66452
GOTERM_MF_DIRECT	GO:0050839~cell adhesion molecule binding	4	9.76	0.0017303	P02671, P02679, P02675, P26038	41	12	1876	15.25	0.196041	0.0530906	1.98556
GOTERM_BP_DIRECT	GO:0007596~blood coagulation	6	14.63	0.00213682	P02671, P02679, P02675, A0A024R571, P01009, P13861, A0A024R6I7	40	46	1887	6.15	0.514714	0.0540984	2.86848
GOTERM_BP_DIRECT	GO:0090277~positive regulation of peptide hormone secretion	3	7.32	0.00243362	P02671, P02679, P02675	40	4	1887	35.38	0.561135	0.0571292	3.26082
GOTERM_BP_DIRECT	GO:0072378~blood coagulation, fibrin clot formation	3	7.32	0.00243362	P02671, P02679, P02675	40	4	1887	35.38	0.561135	0.0571292	3.26082
OMIM_DISEASE	202400~Afibrinogenemia, congenital	3	7.32	0.00253376	P02671, P02679, P02675	19	3	597	31.42	0.10335	0.10335	2.33326
OMIM_DISEASE	616004~Dysfibrinogenemia, congenital	3	7.32	0.00253376	P02671, P02679, P02675	19	3	597	31.42	0.10335	0.10335	2.33326
SMART	SM01212:SM01212	3	7.32	0.00276188	P02671, P02679, P02675	34	3	1061	31.21	0.0972692	0.0335351	2.45278
GOTERM_BP_DIRECT	GO:0045907~positive regulation of vasoconstriction	3	7.32	0.00400308	P02671, P02679, P02675	40	5	1887	28.31	0.742248	0.0864196	5.31121
GOTERM_BP_DIRECT	GO:0031639~plasminogen activation	3	7.32	0.00592635	P02671, P02679, P02675	40	6	1887	23.59	0.865886	0.118003	7.7689
GOTERM_BP_DIRECT	GO:0051258~protein polymerization	3	7.32	0.00592635	P02671, P02679, P02675	40	6	1887	23.59	0.865886	0.118003	7.7689
GOTERM_MF_DIRECT	GO:0005102~receptor binding	6	14.63	0.00732763	P02671, P02679, P02675, P26038, P01024, P01023	41	59	1876	4.65	0.604134	0.143111	8.16449
UP_KEYWORDS	Blood coagulation	4	9.76	0.00777761	P02671, P02679, P02675, P01009, A0A024R6I7	41	21	1991	9.25	0.646002	0.137873	8.72537
UP_KEYWORDS	Hemostasis	4	9.76	0.00777761	P02671, P02679, P02675, P01009, A0A024R6I7	41	21	1991	9.25	0.646002	0.137873	8.72537
INTERPRO	IPR020837:Fibrinogen, conserved site	3	7.32	0.00801926	P02671, P02679, P02675	41	7	1957	20.46	0.703524	0.159438	9.1772
GOTERM_BP_DIRECT	GO:2000352~negative regulation of endothelial cell apoptotic process	3	7.32	0.00818887	P02671, P02679, P02675	40	7	1887	20.22	0.937914	0.143072	10.5844
GOTERM_CC_DIRECT	GO:0005577~fibrinogen complex	3	7.32	0.00822947	P02671, P02679, P02675	41	7	1931	20.18	0.700749	0.113654	9.35492
UP_SEQ_FEATURE	domain:Fibrinogen C-terminal	3	7.32	0.0102177	P02671, P02679, P02675	40	8	1940	18.19	0.885481	0.213985	12.1777
INTERPRO	IPR014716:Fibrinogen, alpha/beta/gamma chain, C-terminal globular, subdomain 1	3	7.32	0.0105547	P02671, P02679, P02675	41	8	1957	17.9	0.798552	0.181497	11.9139
INTERPRO	IPR002181:Fibrinogen, alpha/beta/gamma chain, C-terminal globular domain	3	7.32	0.0105547	P02671, P02679, P02675	41	8	1957	17.9	0.798552	0.181497	11.9139
INTERPRO	IPR014715:Fibrinogen, alpha/beta/gamma chain, C-terminal globular, subdomain 2	3	7.32	0.0105547	P02671, P02679, P02675	41	8	1957	17.9	0.798552	0.181497	11.9139
GOTERM_BP_DIRECT	GO:0050714~positive regulation of protein secretion	3	7.32	0.0107765	P02671, P02679, P02675	40	8	1887	17.69	0.974325	0.175311	13.7068
GOTERM_CC_DIRECT	GO:0031091~platelet alpha granule	3	7.32	0.0108295	P02671, P02679, P02675	41	8	1931	17.66	0.796018	0.134563	12.1394
GOTERM_BP_DIRECT	GO:0045921~positive regulation of exocytosis	3	7.32	0.0136756	P02671, P02679, P02675	40	9	1887	15.73	0.990479	0.207619	17.0848
GOTERM_BP_DIRECT	GO:1902042~negative regulation of extrinsic apoptotic signaling pathway via death domain receptors	3	7.32	0.0136756	P02671, P02679, P02675	40	9	1887	15.73	0.990479	0.207619	17.0848
SMART	SM00186:FBG	3	7.32	0.0233712	P02671, P02679, P02675	34	8	1061	11.7	0.583137	0.135698	19.1314
GOTERM_CC_DIRECT	GO:0009986~cell surface	6	14.63	0.0261681	P02671, P02679, P02787, P01871, P02675, P11021	41	83	1931	3.4	0.979171	0.257551	27.0336
BIOCARTA	h_extrinsicPathway:Extrinsic Prothrombin Activation Pathway	3	7.32	0.0265864	P02671, P02679, P02675	13	7	306	10.09	0.732962	0.732962	22.7683
BIOCARTA	h_fibrinolysisPathway:Fibrinolysis Pathway	3	7.32	0.0265864	P02671, P02679, P02675	13	7	306	10.09	0.732962	0.732962	22.7683
GOTERM_BP_DIRECT	GO:0042730~fibrinolysis	3	7.32	0.0281261	P02671, P02679, P02675	40	13	1887	10.89	0.999935	0.354876	32.1699
BIOCARTA	h_amiPathway:Acute Myocardial Infarction	3	7.32	0.0346728	P02671, P02679, P02675	13	8	306	8.83	0.82256	0.578763	28.7049
GOTERM_MF_DIRECT	GO:0030674~protein binding, bridging	3	7.32	0.0492728	P02671, P02679, P02675	41	17	1876	8.07	0.998282	0.597277	44.2977
GOTERM_BP_DIRECT	GO:0051592~response to calcium ion	3	7.32	0.051712	P02671, P02679, P02675	40	18	1887	7.86	1	0.526585	51.4429
GOTERM_BP_DIRECT	GO:1900026~positive regulation of substrate adhesion-dependent cell spreading	3	7.32	0.0570554	P02671, P02679, P02675	40	19	1887	7.45	1	0.548089	55.0362
GOTERM_BP_DIRECT	GO:0007160~cell-matrix adhesion	3	7.32	0.0625839	P02671, P02679, P02675	40	20	1887	7.08	1	0.554718	58.4935
KEGG_PATHWAY	hsa04611:Platelet activation	4	9.76	0.0669238	Q5JWF2, P02671, P02679, P02675	27	40	1086	4.02	0.99817	0.79317	53.0064
GOTERM_BP_DIRECT	GO:0070374~positive regulation of ERK1 and ERK2 cascade	3	7.32	0.0741587	P02671, P02679, P02675	40	22	1887	6.43	1	0.605499	64.9489
BIOCARTA	h_intrinsicPathway:Intrinsic Prothrombin Activation Pathway	3	7.32	0.0864892	P02671, P02679, P02675	13	13	306	5.43	0.988116	0.587908	57.9928
GOTERM_CC_DIRECT	GO:0005938~cell cortex	3	7.32	0.0995397	P02671, P02679, P02675	41	26	1931	5.43	1	0.553218	71.2409
GOTERM_MF_DIRECT	GO:0005198~structural molecule activity	4	9.76	0.114584	P02671, P02679, A0A087WVQ6, P02675	41	56	1876	3.27	1	0.751918	75.5697
GOTERM_BP_DIRECT	GO:0030168~platelet activation	3	7.32	0.140193	P02671, P02679, P02675	40	32	1887	4.42	1	0.807354	87.1923
GOTERM_BP_DIRECT	GO:0030198~extracellular matrix organization	3	7.32	0.140193	P02671, P02679, P02675	40	32	1887	4.42	1	0.807354	87.1923
GOTERM_BP_DIRECT	GO:0007165~signal transduction	6	14.63	0.189664	P02671, P02679, P02675, Q08380, P01024, Q8NFJ5	40	149	1887	1.9	1	0.883986	94.2811
UP_KEYWORDS	Coiled coil	10	24.39	0.268684	Q5JWF2, P02671, P02679, A0A087WVQ6, P02675, A0A024R571, P26038, Q96LD4, P11021, P35579	41	353	1991	1.38	1	0.798235	97.4236
GOTERM_MF_DIRECT	GO:0046872~metal ion binding	3	7.32	0.922327	Q5JWF2, P02671, P02679	41	188	1876	0.73	1	1	100
Annotation Cluster 7	Enrichment Score: 1.0520027374822403
Category	Term	Count	%	PValue	Genes	List Total	Pop Hits	Pop Total	Fold Enrichment	Bonferroni	Benjamini	FDR
UP_KEYWORDS	Cleavage on pair of basic residues	4	9.76	0.0249027	Q5JWF2, A0A0G2JPR0, P01024, P0C0L5	41	32	1991	6.07	0.965056	0.243838	25.5371
UP_KEYWORDS	Cell projection	6	14.63	0.107028	Q5JWF2, A0A024R571, P26038, A0A0G2JPR0, E9PK25, P0C0L5	41	127	1991	2.29	1	0.547244	73.3832
GOTERM_CC_DIRECT	GO:0030425~dendrite	3	7.32	0.261967	Q5JWF2, A0A0G2JPR0, P0C0L5	41	48	1931	2.94	1	0.771982	97.2962
Annotation Cluster 8	Enrichment Score: 0.9119111489054934
Category	Term	Count	%	PValue	Genes	List Total	Pop Hits	Pop Total	Fold Enrichment	Bonferroni	Benjamini	FDR
GOTERM_CC_DIRECT	GO:0010008~endosome membrane	4	9.76	0.0749572	P02787, A0A024R571, P22314, O43795	41	48	1931	3.92	0.999989	0.487859	60.3899
GOTERM_CC_DIRECT	GO:0048471~perinuclear region of cytoplasm	6	14.63	0.136339	Q5JWF2, P27105, P02787, A0A024R571, P26038, O43795	41	133	1931	2.12	1	0.590027	82.4858
GOTERM_CC_DIRECT	GO:0005769~early endosome	4	9.76	0.179818	O75955, P02787, A0A024R571, O43795	41	71	1931	2.65	1	0.671472	90.5212
Annotation Cluster 9	Enrichment Score: 0.7287691446303282
Category	Term	Count	%	PValue	Genes	List Total	Pop Hits	Pop Total	Fold Enrichment	Bonferroni	Benjamini	FDR
GOTERM_MF_DIRECT	GO:0051015~actin filament binding	4	9.76	0.072486	Q9Y281, E9PK25, O43795, P35579	41	46	1876	3.98	0.999924	0.651272	58.164
UP_KEYWORDS	Actin-binding	4	9.76	0.253069	Q9Y281, E9PK25, O43795, P35579	41	87	1991	2.23	1	0.788237	96.7017
GOTERM_CC_DIRECT	GO:0015629~actin cytoskeleton	3	7.32	0.354976	Q9Y281, E9PK25, P35579	41	60	1931	2.35	1	0.873187	99.4547
Annotation Cluster 10	Enrichment Score: 0.690570968459951
Category	Term	Count	%	PValue	Genes	List Total	Pop Hits	Pop Total	Fold Enrichment	Bonferroni	Benjamini	FDR
GOTERM_CC_DIRECT	GO:0005925~focal adhesion	7	17.07	0.117726	O75955, A0A087WVQ6, P26038, P11021, E9PK25, P13861, P35579	41	164	1931	2.01	1	0.564482	77.4339
GOTERM_CC_DIRECT	GO:0031012~extracellular matrix	5	12.2	0.149345	A0A087WVQ6, P11021, Q08380, E9PK25, P35579	41	100	1931	2.35	1	0.611169	85.3761
GOTERM_CC_DIRECT	GO:0016020~membrane	11	26.83	0.482199	Q5JWF2, O75955, P27105, A0A087WVQ6, A0A024R571, P49327, P11021, Q08380, E9PK25, P13861, P35579	41	457	1931	1.13	1	0.950356	99.96
Annotation Cluster 11	Enrichment Score: 0.3547231903945643
Category	Term	Count	%	PValue	Genes	List Total	Pop Hits	Pop Total	Fold Enrichment	Bonferroni	Benjamini	FDR
GOTERM_CC_DIRECT	GO:0005913~cell-cell adherens junction	7	17.07	0.128278	O75955, A0A024R571, P49327, P11021, O43795, Q8NFJ5, P35579	41	168	1931	1.96	1	0.58166	80.4412
GOTERM_MF_DIRECT	GO:0098641~cadherin binding involved in cell-cell adhesion	6	14.63	0.263903	A0A024R571, P49327, P11021, O43795, Q8NFJ5, P35579	41	163	1876	1.68	1	0.948679	97.1224
GOTERM_BP_DIRECT	GO:0098609~cell-cell adhesion	5	12.2	0.37119	A0A024R571, P49327, P11021, O43795, Q8NFJ5	40	149	1887	1.58	1	0.987167	99.8186
UP_KEYWORDS	Ubl conjugation	6	14.63	0.453769	Q5JWF2, P22314, P49327, P11021, O43795, P35579	41	219	1991	1.33	1	0.937547	99.915
INTERPRO	IPR027417:P-loop containing nucleoside triphosphate hydrolase	5	12.2	0.45875	Q5JWF2, A0A024R571, O43795, Q9H0U4, P35579	41	169	1957	1.41	1	0.999781	99.935
UP_KEYWORDS	Nucleotide-binding	8	19.51	0.544633	Q5JWF2, A0A024R571, P22314, P11021, O43795, P13861, Q9H0U4, P35579	41	342	1991	1.14	1	0.965781	99.9899
UP_KEYWORDS	ATP-binding	5	12.2	0.713184	A0A024R571, P22314, P11021, O43795, P35579	41	235	1991	1.03	1	0.994432	100
UP_SEQ_FEATURE	nucleotide phosphate-binding region:ATP	3	7.32	0.785746	A0A024R571, P22314, P35579	40	140	1940	1.04	1	1	100
GOTERM_MF_DIRECT	GO:0005524~ATP binding	5	12.2	0.804084	A0A024R571, P22314, P11021, O43795, P35579	41	251	1876	0.91	1	0.999994	100
Annotation Cluster 12	Enrichment Score: 0.017424437704988846
Category	Term	Count	%	PValue	Genes	List Total	Pop Hits	Pop Total	Fold Enrichment	Bonferroni	Benjamini	FDR
GOTERM_CC_DIRECT	GO:0016021~integral component of membrane	4	9.76	0.958025	O75955, P01871, A0A0A0MS08, Q8NFJ5	41	296	1931	0.64	1	0.999996	100
UP_KEYWORDS	Transmembrane helix	4	9.76	0.961337	P27105, P01871, A0A0A0MS08, Q8NFJ5	41	310	1991	0.63	1	0.999966	100
UP_KEYWORDS	Transmembrane	4	9.76	0.962662	P27105, P01871, A0A0A0MS08, Q8NFJ5	41	312	1991	0.62	1	0.999962	100
CONTROLS
Annotation Cluster 1	Enrichment Score: 16.016212931369598
Category	Term	Count	%	PValue	Genes	List Total	Pop Hits	Pop Total	Fold Enrichment	Bonferroni	Benjamini	FDR
UP_SEQ_FEATURE	region of interest:Linker 12	14	53.85	5.86e-20	Q8N1N4, P04259, P19013, P35527, P08779, Q7Z794, P13645, P13647, P12036, P02533, P35908, P04264, P02538, Q7Z3Y8	26	26	1940	40.18	1.03e-17	1.03e-17	7.19e-17
UP_SEQ_FEATURE	region of interest:Tail	14	53.85	1.12e-19	Q8N1N4, P04259, P19013, P35527, P08779, Q7Z794, P13645, P13647, P12036, P02533, P35908, P04264, P02538, Q7Z3Y8	26	27	1940	38.69	1.98e-17	9.89e-18	1.38e-16
UP_KEYWORDS	Intermediate filament	14	53.85	1.49e-19	Q8N1N4, P04259, P19013, P35527, P08779, Q7Z794, P13645, P13647, P12036, P02533, P35908, P04264, P02538, Q7Z3Y8	26	28	1991	38.29	9.98e-18	9.98e-18	1.53e-16
INTERPRO	IPR001664:Intermediate filament protein	14	53.85	1.86e-19	Q8N1N4, P04259, P19013, P35527, P08779, Q7Z794, P13645, P13647, P12036, P02533, P35908, P04264, P02538, Q7Z3Y8	26	28	1957	37.63	7.07e-18	7.07e-18	1.68e-16
UP_SEQ_FEATURE	region of interest:Coil 1A	14	53.85	2.08e-19	Q8N1N4, P04259, P19013, P35527, P08779, Q7Z794, P13645, P13647, P12036, P02533, P35908, P04264, P02538, Q7Z3Y8	26	28	1940	37.31	3.67e-17	1.22e-17	2.56e-16
UP_SEQ_FEATURE	region of interest:Coil 1B	14	53.85	2.08e-19	Q8N1N4, P04259, P19013, P35527, P08779, Q7Z794, P13645, P13647, P12036, P02533, P35908, P04264, P02538, Q7Z3Y8	26	28	1940	37.31	3.67e-17	1.22e-17	2.56e-16
UP_SEQ_FEATURE	region of interest:Head	14	53.85	2.08e-19	Q8N1N4, P04259, P19013, P35527, P08779, Q7Z794, P13645, P13647, P12036, P02533, P35908, P04264, P02538, Q7Z3Y8	26	28	1940	37.31	3.67e-17	1.22e-17	2.56e-16
UP_SEQ_FEATURE	region of interest:Linker 1	14	53.85	2.08e-19	Q8N1N4, P04259, P19013, P35527, P08779, Q7Z794, P13645, P13647, P12036, P02533, P35908, P04264, P02538, Q7Z3Y8	26	28	1940	37.31	3.67e-17	1.22e-17	2.56e-16
UP_SEQ_FEATURE	region of interest:Rod	14	53.85	2.08e-19	Q8N1N4, P04259, P19013, P35527, P08779, Q7Z794, P13645, P13647, P12036, P02533, P35908, P04264, P02538, Q7Z3Y8	26	28	1940	37.31	3.67e-17	1.22e-17	2.56e-16
UP_KEYWORDS	Keratin	13	50	3.17e-18	Q8N1N4, P04259, P19013, P35527, P08779, Q7Z794, P13645, P13647, P02533, P35908, P04264, P02538, Q7Z3Y8	26	25	1991	39.82	2.12e-16	1.06e-16	3.25e-15
INTERPRO	IPR018039:Intermediate filament protein, conserved site	13	50	1.28e-17	Q8N1N4, P04259, P19013, P35527, P08779, Q7Z794, P13645, P13647, P12036, P02533, P35908, P04264, P02538	26	27	1957	36.24	4.88e-16	2.44e-16	1.16e-14
UP_SEQ_FEATURE	region of interest:Coil 2	13	50	1.42e-17	Q8N1N4, P04259, P19013, P35527, P08779, Q7Z794, P13645, P13647, P02533, P35908, P04264, P02538, Q7Z3Y8	26	27	1940	35.93	2.51e-15	6.26e-16	1.75e-14
SMART	SM01391:SM01391	14	53.85	1.15e-16	Q8N1N4, P04259, P19013, P35527, P08779, Q7Z794, P13645, P13647, P12036, P02533, P35908, P04264, P02538, Q7Z3Y8	24	28	1061	22.1	1.22e-15	1.22e-15	6.66e-14
GOTERM_CC_DIRECT	GO:0005882~intermediate filament	12	46.15	1.52e-15	Q7Z794, P15924, P13645, P19013, P13647, P02533, P35527, P35908, P14923, P08779, Q7Z3Y8, P02538	26	27	1931	33.01	9.02e-14	9.02e-14	1.54e-12
GOTERM_MF_DIRECT	GO:0005198~structural molecule activity	14	53.85	6.75e-15	Q8N1N4, P15924, P19013, P35527, P14923, P08779, Q7Z794, Q5D862, P13647, P02533, P12036, P04264, P02538, Q7Z3Y8	25	56	1876	18.76	3.32e-13	3.32e-13	6.49e-12
UP_SEQ_FEATURE	site:Stutter	9	34.62	2.67e-12	Q7Z794, Q8N1N4, P04259, P19013, P13647, P02533, P35908, P04264, P02538	26	16	1940	41.97	4.69e-10	9.38e-11	3.27e-09
GOTERM_CC_DIRECT	GO:0045095~keratin filament	9	34.62	9.25e-12	Q7Z794, Q8N1N4, P04259, P19013, P13647, P02533, P35908, P04264, P02538	26	18	1931	37.13	5.37e-10	2.68e-10	9.21e-09
INTERPRO	IPR003054:Type II keratin	8	30.77	1.69e-11	Q7Z794, Q8N1N4, P04259, P19013, P13647, P35908, P04264, P02538	26	12	1957	50.18	6.44e-10	2.15e-10	1.53e-08
UP_KEYWORDS	Coiled coil	16	61.54	2.39e-06	Q8N1N4, P15924, P04259, Q5VW32, P19013, P35527, P08779, Q7Z794, P13645, P13647, P02533, P12036, P35908, P04264, P02538, Q7Z3Y8	26	353	1991	3.47	0.00016	4.01e-05	0.00245486
Annotation Cluster 2	Enrichment Score: 1.6999098826556245
Category	Term	Count	%	PValue	Genes	List Total	Pop Hits	Pop Total	Fold Enrichment	Bonferroni	Benjamini	FDR
UP_SEQ_FEATURE	repeat:9	3	11.54	0.00543214	Q86YZ3, P12036, Q9UBV8	26	9	1940	24.87	0.616594	0.112931	6.46559
UP_SEQ_FEATURE	repeat:8	3	11.54	0.0114035	Q86YZ3, P12036, Q9UBV8	26	13	1940	17.22	0.867151	0.200911	13.1284
UP_SEQ_FEATURE	repeat:7	3	11.54	0.0114035	Q86YZ3, P12036, Q9UBV8	26	13	1940	17.22	0.867151	0.200911	13.1284
UP_SEQ_FEATURE	repeat:6	3	11.54	0.0131995	Q86YZ3, P12036, Q9UBV8	26	14	1940	15.99	0.903536	0.208526	15.0454
UP_SEQ_FEATURE	repeat:5	3	11.54	0.0151106	Q86YZ3, P12036, Q9UBV8	26	15	1940	14.92	0.931421	0.200136	17.0425
UP_SEQ_FEATURE	repeat:4	3	11.54	0.0288282	Q86YZ3, P12036, Q9UBV8	26	21	1940	10.66	0.994191	0.327011	30.1596
UP_SEQ_FEATURE	repeat:3	3	11.54	0.0399119	Q86YZ3, P12036, Q9UBV8	26	25	1940	8.95	0.99923	0.400727	39.3355
UP_SEQ_FEATURE	repeat:1	3	11.54	0.0556548	Q86YZ3, P12036, Q9UBV8	26	30	1940	7.46	0.999958	0.489259	50.4751
UP_SEQ_FEATURE	repeat:2	3	11.54	0.0556548	Q86YZ3, P12036, Q9UBV8	26	30	1940	7.46	0.999958	0.489259	50.4751
Annotation Cluster 3	Enrichment Score: 1.0938366723242436
Category	Term	Count	%	PValue	Genes	List Total	Pop Hits	Pop Total	Fold Enrichment	Bonferroni	Benjamini	FDR
UP_KEYWORDS	Calcium	6	23.08	0.0196189	Q86YZ3, Q5D862, Q02413, P02452, Q9UBV8, P08123	26	129	1991	3.56	0.73487	0.124319	18.39
INTERPRO	IPR018247:EF-Hand 1, calcium-binding site	3	11.54	0.0757694	Q86YZ3, Q5D862, Q9UBV8	26	36	1957	6.27	0.949921	0.450547	50.938
UP_SEQ_FEATURE	domain:EF-hand 1	3	11.54	0.0769258	Q86YZ3, Q5D862, Q9UBV8	26	36	1940	6.22	0.999999	0.585426	62.5536
UP_SEQ_FEATURE	domain:EF-hand 2	3	11.54	0.0806927	Q86YZ3, Q5D862, Q9UBV8	26	37	1940	6.05	1	0.581485	64.3863
INTERPRO	IPR002048:EF-hand domain	3	11.54	0.106996	Q86YZ3, Q5D862, Q9UBV8	26	44	1957	5.13	0.986435	0.511643	64.038
INTERPRO	IPR011992:EF-hand-like domain	3	11.54	0.145516	Q86YZ3, Q5D862, Q9UBV8	26	53	1957	4.26	0.99746	0.574156	75.8573
GOTERM_MF_DIRECT	GO:0005509~calcium ion binding	4	15.38	0.153387	Q86YZ3, Q5D862, Q02413, Q9UBV8	25	107	1876	2.81	0.999714	0.869941	79.7398
Annotation Cluster 4	Enrichment Score: 0.9741676936189572
Category	Term	Count	%	PValue	Genes	List Total	Pop Hits	Pop Total	Fold Enrichment	Bonferroni	Benjamini	FDR
GOTERM_CC_DIRECT	GO:0030057~desmosome	3	11.54	0.00679762	P15924, Q02413, P14923	26	10	1931	22.28	0.32673	0.0941686	6.56114
GOTERM_CC_DIRECT	GO:0031012~extracellular matrix	6	23.08	0.00781748	P15924, Q02413, P02452, P14923, P04264, P08123	26	100	1931	4.46	0.365676	0.0870179	7.51136
GOTERM_BP_DIRECT	GO:0016337~single organismal cell-cell adhesion	3	11.54	0.0108512	P15924, Q02413, P14923	23	14	1887	17.58	0.801061	0.275991	12.1893
UP_KEYWORDS	Cell junction	3	11.54	0.332095	P15924, Q02413, P14923	26	94	1991	2.44	1	0.875087	98.407
UP_KEYWORDS	Membrane	8	30.77	0.870695	P15924, Q5VW32, Q02413, P02452, P14923, P04264, P68871, Q9UBV8	26	732	1991	0.84	1	0.99981	100
UP_KEYWORDS	Cell membrane	3	11.54	0.953574	P15924, Q02413, P04264	26	355	1991	0.65	1	0.999966	100
GOTERM_CC_DIRECT	GO:0005886~plasma membrane	5	19.23	0.953765	P15924, Q02413, P13647, P14923, P04264	26	549	1931	0.68	1	0.999997	100
Annotation Cluster 5	Enrichment Score: 0.79338396097039
Category	Term	Count	%	PValue	Genes	List Total	Pop Hits	Pop Total	Fold Enrichment	Bonferroni	Benjamini	FDR
GOTERM_BP_DIRECT	GO:0042542~response to hydrogen peroxide	3	11.54	0.0238365	P69905, P02452, P68871	23	21	1887	11.72	0.971859	0.360019	24.9808
GOTERM_BP_DIRECT	GO:0007596~blood coagulation	3	11.54	0.0986682	P02452, P68871, P08123	23	46	1887	5.35	1	0.785072	70.9932
UP_KEYWORDS	Glycoprotein	6	23.08	0.529164	P69905, Q02413, P02452, P14923, P68871, P08123	26	378	1991	1.22	1	0.965421	99.9559
GOTERM_CC_DIRECT	GO:0005576~extracellular region	4	15.38	0.538833	P69905, P02452, P68871, P08123	26	215	1931	1.38	1	0.98311	99.9548
Annotation Cluster 6	Enrichment Score: 0.6937039460477331
Category	Term	Count	%	PValue	Genes	List Total	Pop Hits	Pop Total	Fold Enrichment	Bonferroni	Benjamini	FDR
GOTERM_CC_DIRECT	GO:0031012~extracellular matrix	6	23.08	0.00781748	P15924, Q02413, P02452, P14923, P04264, P08123	26	100	1931	4.46	0.365676	0.0870179	7.51136
UP_KEYWORDS	Calcium	6	23.08	0.0196189	Q86YZ3, Q5D862, Q02413, P02452, Q9UBV8, P08123	26	129	1991	3.56	0.73487	0.124319	18.39
UP_KEYWORDS	Glycoprotein	6	23.08	0.529164	P69905, Q02413, P02452, P14923, P68871, P08123	26	378	1991	1.22	1	0.965421	99.9559
UP_SEQ_FEATURE	signal peptide	3	11.54	0.923555	Q02413, P02452, P08123	26	306	1940	0.73	1	1	100
UP_SEQ_FEATURE	glycosylation site:N-linked (GlcNAc...)	3	11.54	0.945322	Q02413, P02452, P08123	26	333	1940	0.67	1	1	100
UP_KEYWORDS	Signal	3	11.54	0.971407	Q02413, P02452, P08123	26	393	1991	0.58	1	0.999988	100
Annotation Cluster 7	Enrichment Score: 0.5861207344028558
Category	Term	Count	%	PValue	Genes	List Total	Pop Hits	Pop Total	Fold Enrichment	Bonferroni	Benjamini	FDR
GOTERM_BP_DIRECT	GO:0051291~protein heterooligomerization	3	11.54	0.0331089	P69905, P14923, P68871	23	25	1887	9.85	0.993147	0.425167	33.044
UP_KEYWORDS	Glycoprotein	6	23.08	0.529164	P69905, Q02413, P02452, P14923, P68871, P08123	26	378	1991	1.22	1	0.965421	99.9559
GOTERM_CC_DIRECT	GO:0005829~cytosol	6	23.08	0.99564	P69905, Q02413, P13647, P02533, P14923, P68871	26	824	1931	0.54	1	1	100
Annotation Cluster 8	Enrichment Score: 0.09667135818766683
Category	Term	Count	%	PValue	Genes	List Total	Pop Hits	Pop Total	Fold Enrichment	Bonferroni	Benjamini	FDR
UP_KEYWORDS	Glycoprotein	6	23.08	0.529164	P69905, Q02413, P02452, P14923, P68871, P08123	26	378	1991	1.22	1	0.965421	99.9559
GOTERM_CC_DIRECT	GO:0016021~integral component of membrane	3	11.54	0.915134	Q02413, P02452, P68871	26	296	1931	0.75	1	0.999983	100
UP_KEYWORDS	Transmembrane helix	3	11.54	0.919765	Q02413, P02452, P68871	26	310	1991	0.74	1	0.999952	100
UP_KEYWORDS	Transmembrane	3	11.54	0.921643	Q02413, P02452, P68871	26	312	1991	0.74	1	0.999924	100
